# Supplementary material for: Phylogenetic analysis and structural prediction reveal the potential functional diversity between green algae SWEET transporters
Source: Front Plant Sci. 2022 Sep 15;13:960133. doi: 10.3389/fpls.2022.960133 (PMC9520054; doi:10.3389/fpls.2022.960133)
Supplement: Supplementary file 1 [file Table_1.XLSX]

## Sheet: Sequence data
SWEET ID	Gene ID	Protein ID with database link	Location	Database	Species	Phylum	Order	No. of TM helix bundles	Cluster	DeepLoc membrane prediction	PProwler membrane prediction	MULocDeep membrane prediction
CrSWEET1	Cre06.g271800.t1.2	14748	chromosome_6:2849661-2845591	JGI Phytozome	Chlamydomonas reinhardtii	Chlorophyta	Chlamydomonadales	2	2	PM	SP/O	PM
CrSWEET2	Cre06.g275000.t1.1	14819	chromosome_6:3104443-3109347	JGI Phytozome	Chlamydomonas reinhardtii	Chlorophyta	Chlamydomonadales	2	3	PM/VM	O	PM
CrSWEET3	Cre07.g340700.t1.1	16664	chromosome_7:4094976-4098787	JGI Phytozome	Chlamydomonas reinhardtii	Chlorophyta	Chlamydomonadales	2	1	PM	SP	PM
CrSWEET4	Cre10.g421650.t1.2	1475	chromosome_10:585331-581436	JGI Phytozome	Chlamydomonas reinhardtii	Chlorophyta	Chlamydomonadales	2	1	PM	SP	PM
CeSWEET1	rna-CEUSTIGMA_g2380.t1	13582	BEGY01_9:1003091-1000804	JGI Phycocosm	Chlamydomonas eustigma	Chlorophyta	Chlamydomonadales	2	3	PM/VM	SP	PM
CeSWEET2	rna-CEUSTIGMA_g9933.t1	12875	BEGY01_81:223425-221299	JGI Phycocosm	Chlamydomonas eustigma	Chlorophyta	Chlamydomonadales	2	1	PM	SP	PM
CeSWEET3	rna-CEUSTIGMA_g8439.t1	10739	BEGY01_59:187507-188898	JGI Phycocosm	Chlamydomonas eustigma	Chlorophyta	Chlamydomonadales	2	2	VM/PM	SP	PM
GpSWEET1	rna5042	1241	scaffold_10:2330971-2328313	JGI Phycocosm	Gonium pectorale	Chlorophyta	Chlamydomonadales	2	2	PM	SP	PM
GpSWEET2	rna2428	9629	scaffold_4:2411267-2408273	JGI Phycocosm	Gonium pectorale	Chlorophyta	Chlamydomonadales	2	1	PM	SP	PM
GpSWEET3	rna4977	1176	scaffold_10:1929343-1926982	JGI Phycocosm	Gonium pectorale	Chlorophyta	Chlamydomonadales	2	3	VM	SP	PM
GpSWEET4	rna3387	14067	scaffold_7:2136648-2140197	JGI Phycocosm	Gonium pectorale	Chlorophyta	Chlamydomonadales	2	1	PM	SP	PM
VcSWEET1	Vocar.0002s0411.1	5648	scaffold_2:3135033-3129838	JGI Phytozome	Volvox carteri	Chlorophyta	Chlamydomonadales	2	3	PM/VM	O	L/PM
VcSWEET2	Vocar.0005s0018.1	12139	scaffold_5:178159-181780	JGI Phytozome	Volvox carteri	Chlorophyta	Chlamydomonadales	2	1	PM	SP	PM
VcSWEET3	Vocar.0016s0026	4015	scaffold_16:183034-185065	JGI Phytozome	Volvox carteri	Chlorophyta	Chlamydomonadales	2	1	PM	SP	PM
VcSWEET4	Vocar.0002s0424	5662	scaffold_2:3230374-3235072	JGI Phytozome	Volvox carteri	Chlorophyta	Chlamydomonadales	2	2	PM	SP	PM
TsSWEET1	rna4188	852	PGGS01_114:237502-233598	JGI Phycocosm	Tetrabaena socialis	Chlorophyta	Chlamydomonadales	2	1	PM	SP	PM
TsSWEET2	rna4597	162	PGGS01_130:217437-221610	JGI Phycocosm	Tetrabaena socialis	Chlorophyta	Chlamydomonadales	2	1	PM	SP	PM
HlSWEET	HaLaN_07687	GFH12060	GFH12060	EBI ENA	Haematococcus lacustris	Chlorophyta	Chlamydomonadales	2	1	VM/PM	SP	PM
DsSWEET1	Dusal.0165s00004.1	3748	scaffold_165:55113-64094	JGI Phytozome	Dunaliella salina	Chlorophyta	Chlamydomonadales	2	3	PM	SP	PM
DsSWEET2	Dusal.0322s00009.1	8924	scaffold_322:106453-102908	JGI Phytozome	Dunaliella salina	Chlorophyta	Chlamydomonadales	2	2	PM	SP	PM
CinSWEET1	g12457.t1	934	scaffold_1:5660256-5663710	JGI Phycocosm	Chlamydomonas incerta	Chlorophyta	Chlamydomonadales	2	1	PM	MTP/SP	PM
CinSWEET2	g10431.t1	3652	scaffold_16:931719-928260	JGI Phycocosm	Chlamydomonas incerta	Chlorophyta	Chlamydomonadales	2	1	PM	SP/MTP	PM
CinSWEET3	g17457.t1	15559	scaffold_8:1624596-1621027	JGI Phycocosm	Chlamydomonas incerta	Chlorophyta	Chlamydomonadales	2	2	PM	SP	PM
CinSWEET4A	g17520.t1	15616	scaffold_8:1908588-1912231	JGI Phycocosm	Chlamydomonas incerta	Chlorophyta	Chlamydomonadales	2	3	PM/VM	O	L
CinSWEET4B	g17520.t2	15617	scaffold_8:1908588-1913082	JGI Phycocosm	Chlamydomonas incerta	Chlorophyta	Chlamydomonadales	2	3	PM/VM	O	L
CschSWEET1A	g15286.t1	6877	scaffold_27:805847-800397	JGI Phycocosm	Chlamydomonas schloesseri	Chlorophyta	Chlamydomonadales	2	3	PM/VM	O	L
CschSWEET1B	g15286.t2	6878	scaffold_27:805847-800397	JGI Phycocosm	Chlamydomonas schloesseri	Chlorophyta	Chlamydomonadales	2	3	PM/VM	O	L/PM
CschSWEET2A	g15352.t2	6945	scaffold_27:1093201-1097051	JGI Phycocosm	Chlamydomonas schloesseri	Chlorophyta	Chlamydomonadales	2	2	PM	SP/O	PM
CschSWEET2B	g15352.t1	6946	scaffold_27:1093201-1097051	JGI Phycocosm	Chlamydomonas schloesseri	Chlorophyta	Chlamydomonadales	2	2	PM	SP/O	PM
CschSWEET3	g9459.t1	8595	scaffold_33:929651-926041	JGI Phycocosm	Chlamydomonas schloesseri	Chlorophyta	Chlamydomonadales	2	1	PM/VM	SP	PM
CschSWEET4	g4222.t1	13223	scaffold_63:343606-347300	JGI Phycocosm	Chlamydomonas schloesseri	Chlorophyta	Chlamydomonadales	2	1	PM	SP	PM
CdSWEET1	g14023.t2	474	C_1:2666296-2663027	JGI Phycocosm	Chlamydomonas debaryana	Chlorophyta	Chlamydomonadales	2	3	VM/PM	O	PM/L
CdSWEET2A	g14082.t1	528	C_1:2928376-2925391	JGI Phycocosm	Chlamydomonas debaryana	Chlorophyta	Chlamydomonadales	2	2	PM	SP	PM
CdSWEET2B	g14082.t2	529	C_1:2928376-2925391	JGI Phycocosm	Chlamydomonas debaryana	Chlorophyta	Chlamydomonadales	2	2	PM	SP	PM
CdSWEET3	g19768.t1	13557	C_44:433786-430027	JGI Phycocosm	Chlamydomonas debaryana	Chlorophyta	Chlamydomonadales	2	1	PM	SP	PM
CdSWEET4	g10160.t1	14066	C_48:61686-65520	JGI Phycocosm	Chlamydomonas debaryana	Chlorophyta	Chlamydomonadales	2	1	PM	SP	PM
TdSWEET1	estExt_fgenesh1_pg.C_170373	8057567	scaffold_17:4879498-4876626	JGI Phycocosm	Tetradesmus deserticola	Chlorophyta	Sphaeropleales	2	unclustered	VM	SP
TdSWEET2	fgenesh1_kg.3_#_26066_#_HAGSN_transcript/80767	7396564	scaffold_3:6625789-6630655	JGI Phycocosm	Tetradesmus deserticola	Chlorophyta	Sphaeropleales	2	unclustered	PM	SP
TdSWEET3	fgenesh1_kg.11_#_11444_#_TRINITY_DN10436_c0_g1_i4	7604725	scaffold_11:2543632-2546384	JGI Phycocosm	Tetradesmus deserticola	Chlorophyta	Sphaeropleales	2	3	PM/VM	SP	PM
RsSWEET1	Rsub_03631	4022	BDRX_1000023:380678-377665	JGI Phycocosm	Raphidocelis subcapitata	Chlorophyta	Sphaeropleales	2	3	PM/VM	SP	PM
RsSWEET2	Rsub_09949	9969	BDRX_1000095:88845-91257	JGI Phycocosm	Raphidocelis subcapitata	Chlorophyta	Sphaeropleales	2	unclustered	PM	SP
MnSWEET1	XM_014041559.1	5135	scaffold_2217:3765-6569	JGI Phycocosm	Monoraphidium neglectum	Chlorophyta	Sphaeropleales	2	unclustered	PM	SP
MnSWEET2	XM_014040396.1	5976	scaffold_2472:1575-2720	JGI Phycocosm	Monoraphidium neglectum	Chlorophyta	Sphaeropleales	1	unclustered	PM	SP
ToSWEET1	fgenesh1_kg.1_#_2587_#_TRINITY_DN799_c0_g1_i4	3662288	scaffold_1:2757767-2761168	JGI Phycocosm	Tetradesmus obliquus	Chlorophyta	Sphaeropleales	2	3	PM	SP	PM
ToSWEET2	genesh1_kg.14_#_2618_#_TRINITY_DN9165_c0_g2_i1	3820860	scaffold_14:1351451-1355911	JGI Phycocosm	Tetradesmus obliquus	Chlorophyta	Sphaeropleales	2	unclustered	PM	SP
ToSWEET3	fgenesh1_kg.11_#_7561_#_TRINITY_DN4226_c0_g3_i3	3792828	scaffold_11:3353233-3358072	JGI Phycocosm	Tetradesmus obliquus	Chlorophyta	Sphaeropleales	2	unclustered	PM	SP
ToSWEET4	CE2875042_76	2875043	scaffold_7:121163-123603	JGI Phycocosm	Tetradesmus obliquus	Chlorophyta	Sphaeropleales	2	unclustered	PM	SP
ToSWEET5	fgenesh1_kg.23_#_2619_#_TRINITY_DN11315_c0_g1_i1	3887284	scaffold_23:1339348-1337185	JGI Phycocosm	Tetradesmus obliquus	Chlorophyta	Sphaeropleales	2	unclustered	PM	SP
SoSWEET1	augustus_masked-scaffold_479-processed-gene-0.15-mRNA-1	25169	scaffold_479:30780-34027	JGI Phycocosm	Scenedesmus obliquus	Chlorophyta	Sphaeropleales	2	3	PM	SP	PM
CsSWEET	rna-gnl|WGS:LHPG|mrna.C2E21_4186	9183	LHPG02_7:1898941-1901372	JGI Phycocosm	Chlorella sorokiniana (UTEX 1602)	Chlorophyta	Chlorellales	2	unclustered	PM	SP
CsSWEET1	CSI_122800005471-RA	1833	scaffold_11:1917039-1918995	JGI Phycocosm	Chlorella sorokiniana (1228)	Chlorophyta	Chlorellales	2	unclustered	PM	SP
CsSWEET2	CSI_122800003163-RA	9245	scaffold_4:3220167-3223006	JGI Phycocosm	Chlorella sorokiniana (1228)	Chlorophyta	Chlorellales	2	unclustered	PM/VM	SP
CsSWEET3	CSI_122800004393-RA	10559	scaffold_6:2634946-2637108	JGI Phycocosm	Chlorella sorokiniana (1228)	Chlorophyta	Chlorellales	2	unclustered	PM	SP
CsSWEET4	CSI_122800007328-RA	11965	scaffold_9:1292513-1295341	JGI Phycocosm	Chlorella sorokiniana (1228)	Chlorophyta	Chlorellales	2	unclustered	PM	SP
CvSWEET1	estExt_fgenesh3_kg.C_120012	59697	scaffold_12:1294908-1296985	JGI Phycocosm	Chlorella variabilis	Chlorophyta	Chlorellales	2	unclustered	PM	SP
ApSWEET1	XM_011403556.1	4470	scaffold_351:160326-161639	JGI Phycocosm	Auxenochlorella protothecoides	Chlorophyta	Chlorellales	2	unclustered	PM	SP
ApSWEET2	g.11581	JAT73874	JAT73874	EBI ENA	Auxenochlorella protothecoides	Chlorophyta	Chlorellales	1	unclustered	PM	SP
ApSWEET3	g.41147	JAT69825	JAT69825	EBI ENA	Auxenochlorella protothecoides	Chlorophyta	Chlorellales	2	unclustered	PM	SP
HeliSWEET	H632_c817p0	KDD75192	KDD75192	EBI ENA	Helicosporidium sp.	Chlorophyta	Chlorellales	2	unclustered	PM/VM	SP
TspSWEET1	rna-gnl|WGS:VXIU|FRX49_12515-mRNA-1_mrna_FRX49_12515	13077	VXIU01_84:49656-52216	JGI Phycocosm	Trebouxia sp.	Chlorophyta	Trebouxiales	2	unclustered	PM	SP/O
TspSWEET2	rna-gnl|WGS:VXIU|FRX49_09169-mRNA-1_mrna_FRX49_09169	7631	VXIU01_36:93314-95891	JGI Phycocosm	Trebouxia sp.	Chlorophyta	Trebouxiales	2	unclustered	PM	SP
CsubSWEET1	estExt_fgenesh1_pm.C_140037	54208	scaffold_14:522566-524587	JGI Phytozome	Coccomyxa subellipsoidea	Chlorophyta	Trebouxiales	2	unclustered	-	SP
CpSWEET	rna-gnl|IITBIO|A3770_05p35390_mRNA_A3770_05p35390	3539	CP_31038:1926-2702	JGI Phycocosm	Chloropicon primus	Chlorophyta	Chloropicales	2	unclustered	-	SP
TstSWEET1	TSEL_007767.t1	462817	Tetraselmis_686:28864-31418	JGI Phycocosm	Tetraselmis striata	Chlorophyta	Chlorodendrales	2	unclustered	-	MTP
TstSWEET2	TSEL_017488.t1	427319	Tetraselmis_1540:220912-225601	JGI Phycocosm	Tetraselmis striata	Chlorophyta	Chlorodendrales	2	unclustered	-	O
TstSWEET3	TSEL_034016.t1	446475	Tetraselmis_2929:74321-76084	JGI Phycocosm	Tetraselmis striata	Chlorophyta	Chlorodendrales	2	unclustered	-	MTP
OlSWEET	eugene.0400010162	31086	Chr_4:278611-279339	JGI Phycocosm	Ostreococcus lucimarinus	Chlorophyta	Mammiellales	2	unclustered	PM	SP
OtSWEET	OT_ostta04g01580T0	73928	scaffold_4:274268-275020	JGI Phycocosm	Ostreococcus tauri	Chlorophyta	Mammiellales	2	unclustered	PM	SP
BpSWEET	XM_007508082.1	3399	scaffold_18:76212-77051	JGI Phycocosm	Bathycoccus prasinos	Chlorophyta	Mammiellales	2	unclustered	PM	SP
McomSWEET	wlab.234120.1	3314	Chr_04:1283227-1284105	JGI Phycocosm	Micromonas commoda	Chlorophyta	Mammiellales	2	unclustered	PM	SP
AtrSWEET1	AMTR_s00071p00055180	U5DEL5	ERN19882	EBI ENA	Amborella trichopoda	Streptophyta	Amborellales	2	Outlier
AtrSWEET2	AMTR_s00058p00167200	W1PFZ9	ERN06624.1	EBI ENA	Amborella trichopoda	Streptophyta	Amborellales	2	Outlier
AtrSWEET3	AMTR_s00058p00153960	W1PF50	ERN06598	EBI ENA	Amborella trichopoda	Streptophyta	Amborellales	2	Outlier
AtrSWEET4	AMTR_s00045p00186460	W1P3E6	ERN02154	EBI ENA	Amborella trichopoda	Streptophyta	Amborellales	2	Outlier
AtrSWEET5	AMTR_s00021p00241520	W1Q131	ERN14115	EBI ENA	Amborella trichopoda	Streptophyta	Amborellales	2	Outlier
AtrSWEET6	AMTR_s00016p00202420	W1PF56	ERN06256	EBI ENA	Amborella trichopoda	Streptophyta	Amborellales	2	Outlier
AtrSWEET7	AMTR_s00015p00257420	W1PP30	ERN08935	EBI ENA	Amborella trichopoda	Streptophyta	Amborellales	2	Outlier
AtrSWEET8	AMTR_s00007p00265730	W1PD49	ERN05551	EBI ENA	Amborella trichopoda	Streptophyta	Amborellales	2	Outlier
SmoSWEET1	SELMODRAFT_423460	D8SLS6	EFJ14712	EBI ENA	Selaginella moellendorffii	Streptophyta	Selaginellales	2	Outlier
SmoSWEET2	SELMODRAFT_100947	D8RTB6	EFJ24655	EBI ENA	Selaginella moellendorffii	Streptophyta	Selaginellales	2	Outlier
SmoSWEET3	SELMODRAFT_412592	D8RLZ7	EFJ26802	EBI ENA	Selaginella moellendorffii	Streptophyta	Selaginellales	2	Outlier
SmoSWEET4	SELMODRAFT_36361	D8RLZ1	EFJ26801	EBI ENA	Selaginella moellendorffii	Streptophyta	Selaginellales	2	Outlier
SmoSWEET5	SELMODRAFT_92287	D8RFP3	EFJ29154	EBI ENA	Selaginella moellendorffii	Streptophyta	Selaginellales	2	Outlier
SmoSWEET6	SELMODRAFT_68079	D8QSC2	EFJ37411	EBI ENA	Selaginella moellendorffii	Streptophyta	Selaginellales	2	Outlier
SmoSWEET7	SELMODRAFT_78482	D8QVJ3	EFJ36466	EBI ENA	Selaginella moellendorffii	Streptophyta	Selaginellales	2	Outlier
MapSWEET1	Mapoly0150s0010	Mp4g04860	Mp4g04860	Evorepro	Marchantia polymorpha	Streptophyta	Marchantiales	2	Outlier
MapSWEET2	Mapoly0239s0009	Mp6g08040	Mp6g08040	Evorepro	Marchantia polymorpha	Streptophyta	Marchantiales	2	Outlier
PhpaSWEET1	Pp3c10_2460	PNR46189	PNR46189	EBI ENA	Physcomitrella patens	Streptophyta	Funariales	2	Outlier
SpfaSWEET1	Sphfalx0203s0023.1	310	super_203:347022..349435	JGI Phytozome	Sphagnum fallax	Streptophyta	Sphagnales	2	Outlier
AmaSWEET1	AMAG_10301T0	7200	Supercontig_22:242939-243987	JGI Mycocosm	Allomyces macrogynus	Blastocladiomycota	Blastocladiales	2	unclustered
AmaSWEET2	AMAG_18029T0	13064	Supercontig_4:1217248-1218318	JGI Mycocosm	Allomyces macrogynus	Blastocladiomycota	Blastocladiales	2	unclustered
AmaSWEET3	AMAG_06951T0	1507	Supercontig_10:1055011-1056272	JGI Mycocosm	Allomyces macrogynus	Blastocladiomycota	Blastocladiales	2	5
AmaSWEET4	AMAG_03797T0	18075	Supercontig_7:1511294-1512997	JGI Mycocosm	Allomyces macrogynus	Blastocladiomycota	Blastocladiales	2	5
AmaSWEET5	AMAG_03987T0	16614	Supercontig_6:328822-330346	JGI Mycocosm	Allomyces macrogynus	Blastocladiomycota	Blastocladiales	2	5
AmaSWEET6	AMAG_01492T0	6030	Supercontig_2:1357856-1359489	JGI Mycocosm	Allomyces macrogynus	Blastocladiomycota	Blastocladiales	2	5
NcSWEET1	estExt_Genewise1Plus.C_200019	450485	scaffold_20:79426-80773	JGI Mycocosm	Neocallimastix californiae	Chytridiomycota	Neocallimastigales	2	4
NcSWEET1A	estExt_fgenesh1_pg.C_1320007	672410	scaffold_132:57877-59129	JGI Mycocosm	Neocallimastix californiae	Chytridiomycota	Neocallimastigales	2	4
NcSWEET1B	estExt_fgenesh1_pg.C_1320008	672411	scaffold_132:63652-64876	JGI Mycocosm	Neocallimastix californiae	Chytridiomycota	Neocallimastigales	2	4
NcSWEET1C	estExt_fgenesh1_pg.C_1320006	672409	scaffold_132:53970-55190	JGI Mycocosm	Neocallimastix californiae	Chytridiomycota	Neocallimastigales	2	4
NcSWEET1D	estExt_fgenesh1_pg.C_1320009	672412	scaffold_132:67663-68965	JGI Mycocosm	Neocallimastix californiae	Chytridiomycota	Neocallimastigales	2	4
NcSWEET2	CE207464_595	207465	scaffold_43:711381-713852	JGI Mycocosm	Neocallimastix californiae	Chytridiomycota	Neocallimastigales	2	unclustered
NcSWEET3	CE79939_801	79940	scaffold_171:22895-24544	JGI Mycocosm	Neocallimastix californiae	Chytridiomycota	Neocallimastigales	2	4
NcSWEET4	estExt_Genewise1Plus.C_1710014	460436	scaffold_171:26982-28209	JGI Mycocosm	Neocallimastix californiae	Chytridiomycota	Neocallimastigales	2	4
NcSWEET5	estExt_fgenesh1_pg.C_420019	667320	scaffold_42:140496-142564	JGI Mycocosm	Neocallimastix californiae	Chytridiomycota	Neocallimastigales	2	unclustered
AtSWEET13	AT5G50800	SWEET13	NM_124458	NCBI	Arabidopsis thaliana	Streptophyta	Brassicales	2	Outlier
AtSWEET9	AT2G39060	SWEET9	NM_129463	NCBI	Arabidopsis thaliana	Streptophyta	Brassicales	2	Outlier
AtSWEET1	AT1G21460	SWEET1	NM_101997.3	NCBI	Arabidopsis thaliana	Streptophyta	Brassicales	2	Outlier
AtSWEET2	AT3G14770	SWEET2	NM_112338	NCBI	Arabidopsis thaliana	Streptophyta	Brassicales	2	Outlier
AtSWEET4	AT3G28007	SWEET4	NM_113718	NCBI	Arabidopsis thaliana	Streptophyta	Brassicales	2	Outlier
AtSWEET5	AT5G62850	SWEET5	NM_125680	NCBI	Arabidopsis thaliana	Streptophyta	Brassicales	2	Outlier
AtSWEET8	AT5G40260	SWEET8	NM_123390	NCBI	Arabidopsis thaliana	Streptophyta	Brassicales	2	Outlier
OsSWEET2b	LOC_Os01g50460	SWEET2B	NC_029256.1	NCBI	Oryza sativa	Streptophyta	Poales	2	Outlier
